# Supplementary material for: Hsa_circRNA_0088036 acts as a ceRNA to promote bladder cancer progression by sponging miR-140-3p
Source: PubMed Central journal article supplement (PMC8993833; doi:10.1038/s41419-022-04732-w), 2022-04-08

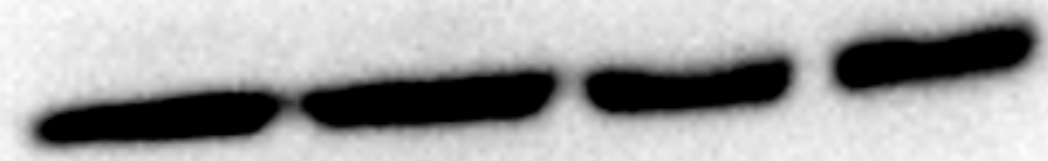



— — — —

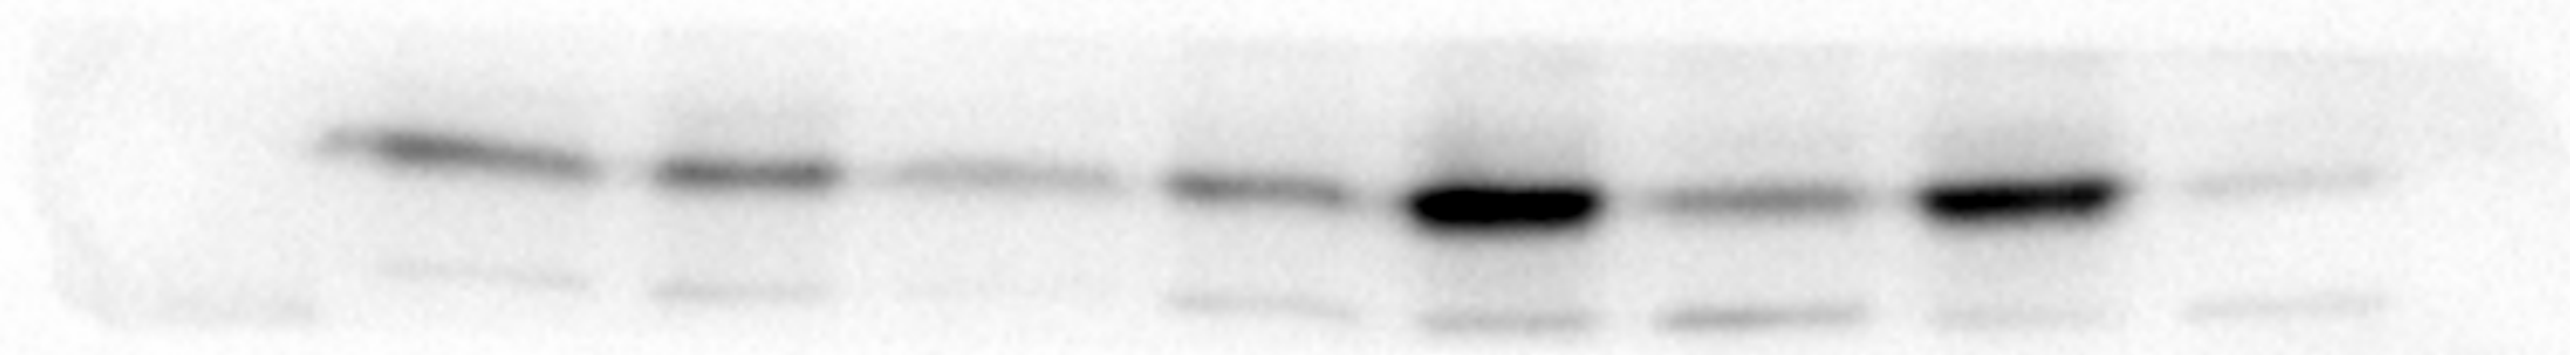



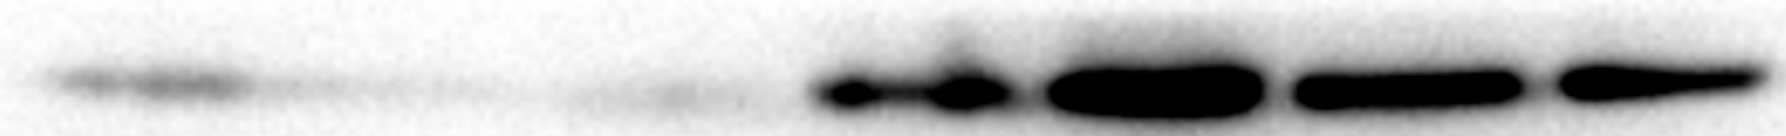



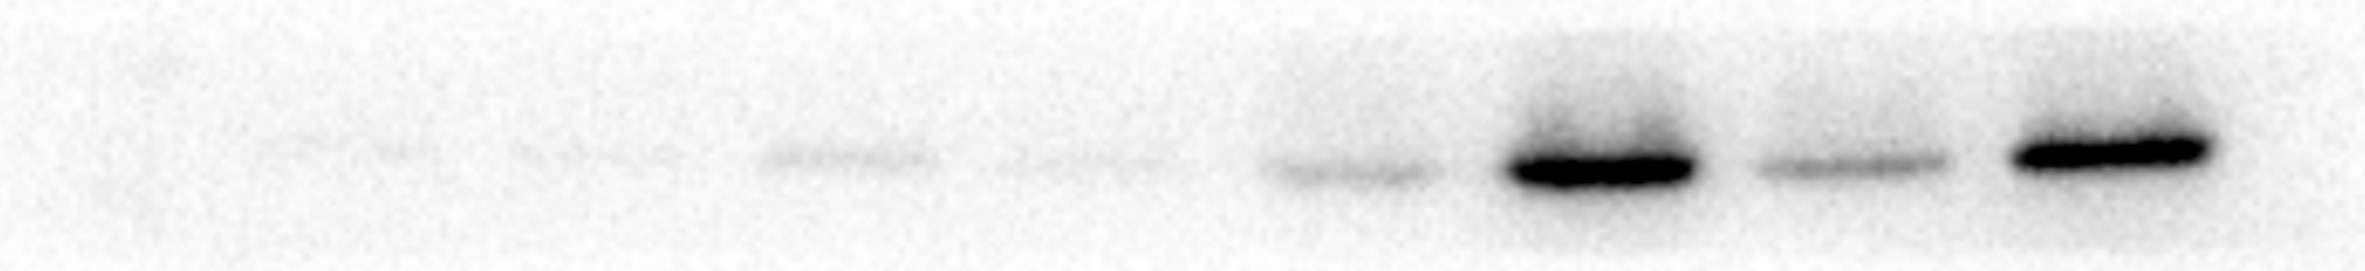



— — — — —



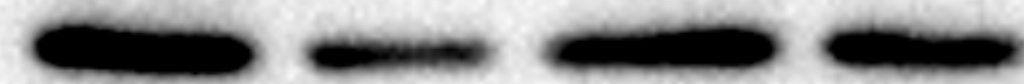



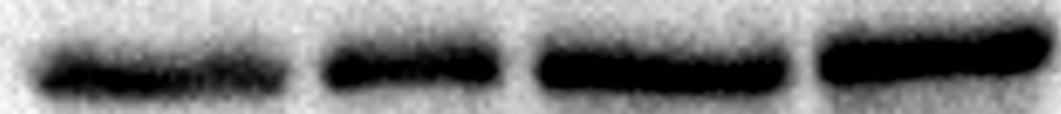



— — — —



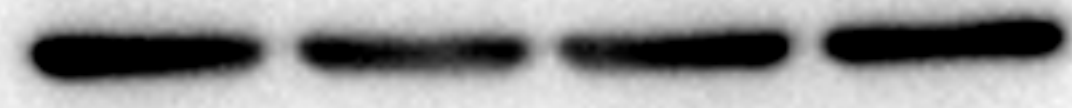

Supplement: 41419_2022_4732_MOESM2_ESM.pdf [file 41419_2022_4732_MOESM2_ESM.pdf]
